# Supplementary material
Source: PubMed Central journal article supplement (PMC3521790)
Supplement: 11_480_Ntoufa.Suppl.pdf [file 11_480_Ntoufa.Suppl.pdf]

Supplemental Data

Distinct Innate Immunity Pathways to Activation and Tolerance in Subgroups of Chronic Lymphocytic Leukemia with Distinct Immunoglobulin Receptors

Stavroula Ntoufa,<sup>1,2</sup> Anna Vardi,<sup>2</sup> Nikos Papakonstantinou,<sup>2</sup> Achilles Anagnostopoulos,<sup>2</sup> Vassiliki Aleporou-Marinou,<sup>1</sup> Chrysoula Belessi,<sup>3</sup> Paolo Ghia,<sup>4,5,6,7</sup> Federico Caligaris-Cappio,<sup>4,5,6,7</sup> Marta Muzio,<sup>4,7</sup> and Kostas Stamatopoulos<sup>2,8</sup>

Online address: <http://www.molmed.org>

The Feinstein Institute for Medical Research North Shore LIJ

Supplemental Figure 1A

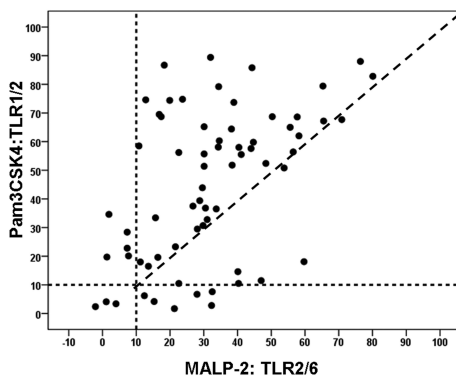

Supplemental Figure 1B

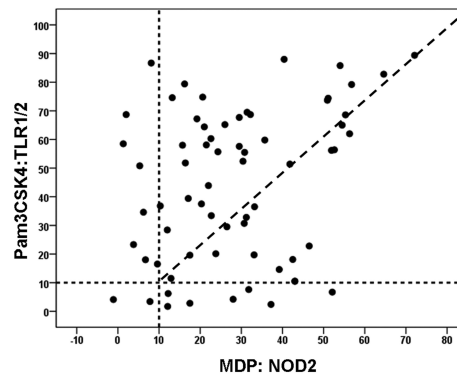

Supplemental Figure 1C

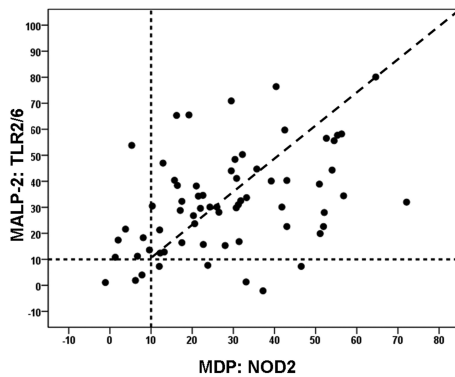

Supplemental Figure 1D

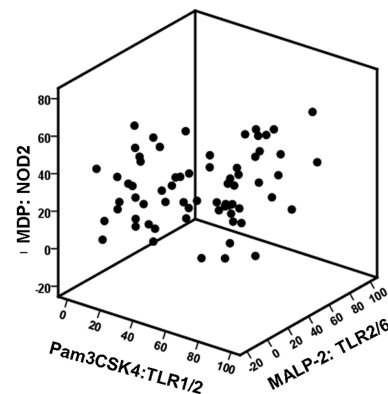

**Supplementary Figure S1.** CLL cells exhibit concordant patterns of response to stimulation of TLR1/2, TLR2/6 and NOD2 with the appropriate ligands. From the pairs of CD25 and CD86 values for each stimulation experiment with Pam3CSK4, MALP-2 and MDP, the maximum value was selected as the representative value of responsiveness. Spearman correlation test revealed that (i) 53/58 cases (91%) showed qualitatively similar responses after TLR1/2 and TLR2/6 stimulation ( $p < 0.001$ ,  $R = 0.46$ ); (ii) 50/57 (88%) and 52/57 (91%) cases responsive to NOD2 were also responsive to TLR1/2 and TLR2/6, respectively ( $p < 0.05$ ,  $R = 0.26$  and  $p < 0.001$ ,  $R = 0.42$ ); and, (iii) 46/65 (71%) cases had concordant patterns of response to stimulation of TLR1/2, TLR2/6 and NOD2 with their respective ligands ( $p < 0.05$ ). Pairwise scatter plots showing the distribution of the pairs of the new "max" variables indicate concordant patterns of response in independent stimulation of (A) TLR1/2 and TLR2/6; (B) TLR1/2 and NOD-2; (C) TLR2/6 and NOD-2; and, (D) all the above receptors.

Supplemental Figure 2A

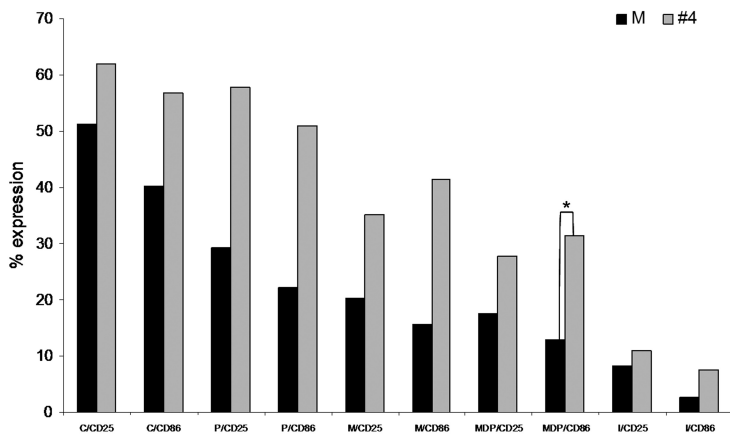

Supplemental Figure 2B

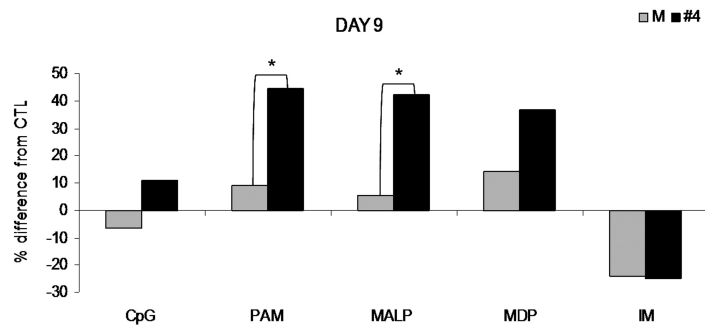

Supplemental Figure 2C

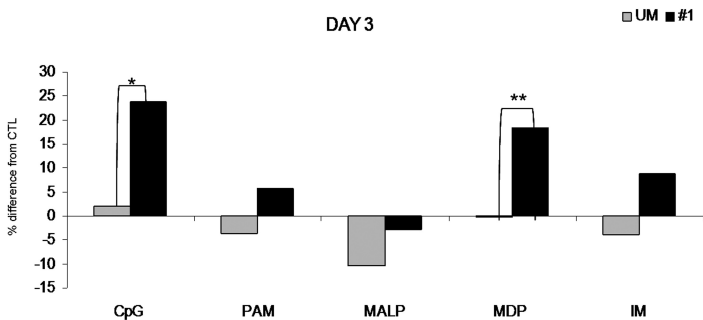

**Supplementary Figure S2.** Distinct innate immunity responses in stereotyped CLL subsets are independent of mutational status. (A) Differences in CD25 and CD86 expression after stimulation of TLRs and NOD2 in M-CLL vs subset #4. (B) Differences in CLL cell viability after stimulation of TLRs and NOD2 in M-CLL vs subset #4. (C) Differences in CLL cell viability after stimulation of TLRs and NOD2 in U-CLL vs subset #1. Prior to statistical analysis values were normalized to the unstimulated controls. C: CpG ODN, P: Pam3CSK4, M: MALP-2, MD:MDP, I:Imiquimod, \*  $p < 0.05$ , \*\*  $p < 0.005$ .

Supplemental Figure 3A

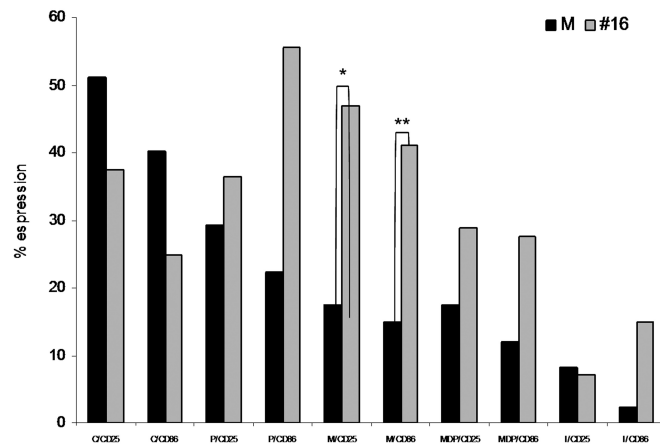

Supplemental Figure 3B

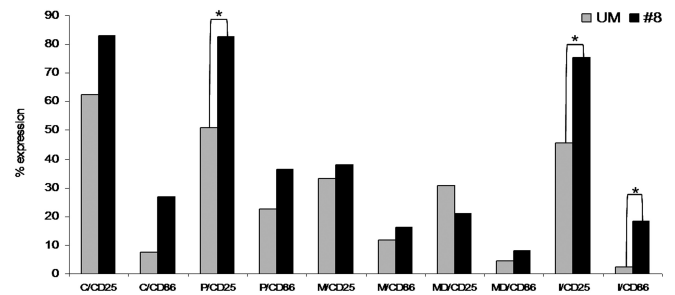

Supplemental Figure 3C

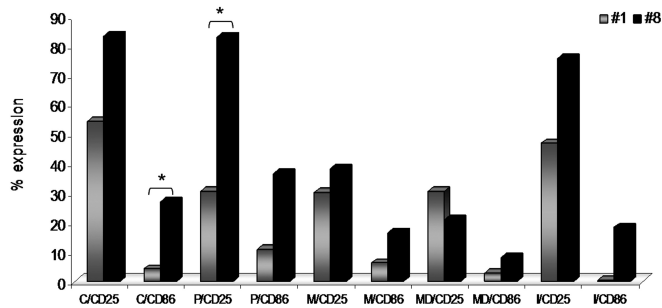

Supplemental Figure 3D

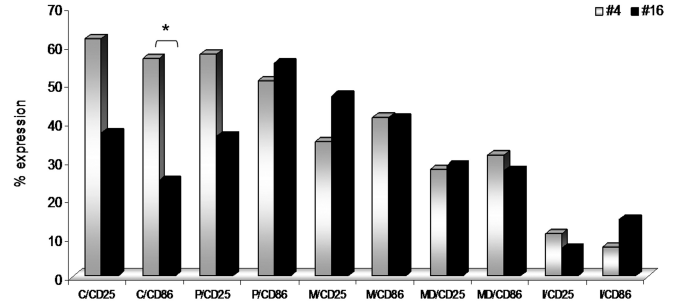

**Supplemental Figure S3.** Differential responses to TLR and NOD2 stimulation in the 'minor' subsets of CLL cases with stereotyped BcRs, irrespective of *IGHV* gene mutational status. (A) Differences in CD25 and CD86 expression after stimulation of TLRs and NOD2 in M-CLL vs subset #16. (B) Differences in CD25 and CD86 expression after stimulation of TLRs and NOD2 in UM-CLL vs subset #8. (C) Comparison of unmutated subset #1 versus unmutated subset #8 revealed statistically significant differences in the induction of CD25 and CD86 after TLR1/2 stimulation with Pam3CSK4. (D) Comparison of mutated subset #4 vs mutated subset #16 revealed statistically significant differences in the induction of CD86 after TLR9 stimulation with CpG. The graphs are based on median values (before statistical analysis values were normalized to the unstimulated controls). C: CpG ODN, P: Pam3CSK4, M: MALP-2, MD:MDP, I:Imiquimod, \*  $p < 0.05$ .

**Supplementary Table S1.** Demographic, biological and clinical data of CLL patients included in the study.

sIGH: surface Ig heavy isotype; sIGL: surface Ig light isotype; sCD38: surface CD38; cZAP-70: cytoplasmic ZAP-70.

| Lab Identifier | Sex | Age of Diagnosis | Rai | Binet | Disease Progression | Last Follow-Up | Current status | sIGH | sIGL   | sCD38 | cZAP-70 | Karyotype                                                                                                                 | FISH          |
|----------------|-----|------------------|-----|-------|---------------------|----------------|----------------|------|--------|-------|---------|---------------------------------------------------------------------------------------------------------------------------|---------------|
| P4699          | F   | 76               | 0   | A     | YES                 | 5/12/09        | ALIVE          | MD   | kappa  | 33.5  | 73      |                                                                                                                           | Trisomy 12    |
| P3506          | M   | 71               | 0   | A     | YES                 | 12/15/09       | ALIVE          | MD   | kappa  | 31.1  | 49      | 47,XX,+12                                                                                                                 | Trisomy 12    |
| P3870          | M   | 68               | 0   | A     | NO                  | 11/2/09        | ALIVE          | MD   | kappa  |       |         | 46,XY                                                                                                                     |               |
| P4295          | F   | 57               | 0   | A     | NO                  | 10/12/09       | ALIVE          | MD   | lambda | 0.3   | 33      | 46,XX                                                                                                                     | Del13q        |
| P2355          | M   | 54               | II  | A     | YES                 | 1/22/10        | ALIVE          | MD   | kappa  | 4.5   | 47      | 46,XY                                                                                                                     | normal        |
| P2685          | F   | 67               | 0   | A     | NO                  | 12/15/09       | ALIVE          | MD   | lambda | 0.5   | 12      |                                                                                                                           | normal        |
| P3073          | F   | 38               | IV  | C     | YES                 | 4/15/09        | DEAD           | MD   | kappa  | 40    | 65      | 46,XX,del(6)(q21q27)                                                                                                      | normal        |
| P8805          | F   | 70               | I   | A     | YES                 | 1/20/10        | ALIVE          | MD   | kappa  | 7.4   | 37      | 46,XX,t(2:13)(p23;q14)[2]/46,XX[24]                                                                                       | Del13q+Del11q |
| P9320          | M   | 47               | I   | A     | NO                  | 5/19/10        | ALIVE          | MD   | kappa  | 43.6  | 24      |                                                                                                                           | normal        |
| P1697          | M   | 60               | II  | A     | YES                 | 1/14/10        | ALIVE          | MD   | kappa  | 0.3   |         | 46,XY                                                                                                                     |               |
| P571           | M   | 47               | 0   | A     | YES                 | 7/20/07        | ALIVE          | MD   | kappa  | 7.8   |         | 47,XY,+12                                                                                                                 |               |
| P8762          | M   | 62               | I   | A     | YES                 | 1/14/10        | ALIVE          | MD   | lambda | 67.3  | 55      | 46,XY (20)                                                                                                                | normal        |
| P1618          | M   | 62               | 0   | A     | NO                  | 11/10/09       | ALIVE          | MD   | lambda | 1.1   | 3       | 46,XY                                                                                                                     | normal        |
| P1156          | F   | 63               | II  | A     | YES                 | 2/23/10        | DEAD           | M    | kappa  | 66.4  | 68.9    | 47,XX,inv(9)(p13q22),+12/47,XX,t(1:13)(p12;q12),inv(9)(p13q22),+12                                                        |               |
| P5283          | M   | 61               | I   | A     | NO                  | 11/23/09       | ALIVE          | MD   | lambda | 91.7  | 60.5    | 46,XY                                                                                                                     |               |
| P511           | M   | 63               | II  | B     | YES                 | 12/21/09       | ALIVE          | MD   | lambda | 16.9  |         |                                                                                                                           |               |
| P2329          | F   | 57               | 0   | A     | NO                  | 10/7/09        | ALIVE          | MD   | lambda | 15    | 12.5    | 46,XX                                                                                                                     | normal        |
| P7155          | M   | 50               | 0   | A     | NO                  | 10/5/09        | ALIVE          | MD   | lambda | 20.8  | 54.1    | 46,XY (25)                                                                                                                | Del11q        |
| P2618          | F   | 78               | 0   | A     | NO                  | 9/7/09         | ALIVE          | MD   | kappa  | 1.8   |         |                                                                                                                           |               |
| P8192          | M   | 54               | I   | A     | NO                  | 11/9/09        | ALIVE          | MD   | kappa  | 1.9   | 18.3    | 46,XY(10)                                                                                                                 | normal        |
| P7794          | F   | 76               | 0   | A     | NO                  | 9/7/09         | ALIVE          | G    | kappa  | 34    | 0.5     | 47,XX,+12                                                                                                                 | Trisomy 12    |
| P6124          | M   | 68               | 0   | A     | NO                  | 12/1/09        | ALIVE          | MD   | lambda | 2.5   | 10.3    | 46,XY                                                                                                                     | normal        |
| P9940          | M   | 33               | I   | A     | NO                  |                | ALIVE          | G    | kappa  | 0.2   | 1.4     |                                                                                                                           |               |
| P4383          | F   | 69               | 0   | A     | NO                  | 12/1/09        | ALIVE          | G    | kappa  | 0     | 6.3     | 46,XX                                                                                                                     |               |
| P6460          | M   | 69               | 0   | A     | NO                  | 11/23/09       | ALIVE          | MD   | lambda | 0.9   | 5.1     | 46,XY (15)                                                                                                                | normal        |
| P1894          | M   | 52               | 0   | A     | NO                  | 9/7/09         | ALIVE          | M    | kappa  | 5.3   |         | 46,XY                                                                                                                     | Del13q+Del13q |
| P427           | M   | 53               | 0   | A     | NO                  | 9/7/09         | ALIVE          | MD   | kappa  | 0.6   |         |                                                                                                                           |               |
| P2577          | M   | 37               | 0   | A     | NO                  | 11/27/09       | ALIVE          | MD   | lambda | 1.2   | 6       | 46,XY,inv(9)(p13q21)                                                                                                      | normal        |
| P2548          | M   | 69               | I   | A     | YES                 | 12/10/09       | ALIVE          | MD   | kappa  | 28.2  |         | 46,X,t(Y;11)(q12;q23),del(13)(q12q14)/46,XY,t(3;5)(q29;q23)                                                               |               |
| P5231          | M   | 57               | II  | B     | YES                 | 11/25/09       | ALIVE          | MD   | kappa  | 91.5  | 17.8    | 46,XY                                                                                                                     | normal        |
| P5728          | M   | 53               | I   | A     | NO                  | 6/15/09        | ALIVE          | MD   | lambda | 32.5  | 2.4     | 46,XY                                                                                                                     | normal        |
| P5949          | M   | 50               | 0   | A     | NO                  | 11/11/09       | ALIVE          | MD   | kappa  | 0.5   | 5.5     | 46,XY                                                                                                                     | normal        |
| P4875          | F   | 72               | 0   | A     | NO                  | 10/20/09       | ALIVE          | MD   | kappa  | 1.4   | 13.4    | 46,XX                                                                                                                     | Del13q        |
| P7961          | F   |                  |     |       |                     |                |                | MD   | kappa  | 4.4   | 28.6    | 46,XX,der(4)t(4;17)(p11;q11),-17+mar(11) / 44,X,-X,der(4)t(4;17)(p11;q11),-13,add(15)(p13),-17,+mar1,+dmin (7) / 46,XY(8) |               |
| P5017          | F   | 70               | 0   | A     | YES                 | 12/7/09        | ALIVE          | MD   | kappa  | 12.2  | 40      |                                                                                                                           | Del13q+Del17p |

Continued

Supplementary Table S1. Continued.

|       |   |    |    |   |     |          |       |    |        |      |      |                                                    |  |  |               |
|-------|---|----|----|---|-----|----------|-------|----|--------|------|------|----------------------------------------------------|--|--|---------------|
| P6068 | F | 76 | 0  | A | NO  | 9/29/09  | ALIVE | MD | kappa  | 0.6  | 14   |                                                    |  |  |               |
| P1055 | F | 48 | I  | A | NO  | 11/25/09 | ALIVE | MD | kappa  | 2.2  | 28   | Not determined                                     |  |  |               |
| P1188 | M | 58 | I  | B | NO  | 12/1/09  | ALIVE | MD | lambda | 4.3  | 14   | 46,XY                                              |  |  | normal        |
| P280  | M | 60 | O  | A | NO  | 8/31/09  | ALIVE | MD | lambda | 2.5  | 15   | 46,XY,t(9;12)(p11;q11)                             |  |  |               |
| P2528 | F | 52 | I  | A | NO  | 9/28/09  | ALIVE | MD | kappa  | 1.8  | 15   |                                                    |  |  |               |
| P8699 | F |    |    |   |     |          |       | MD | kappa  | 0.5  | 24.3 |                                                    |  |  |               |
| P3020 | F | 66 | O  | A | NO  | 10/15/09 | ALIVE | G  | kappa  | 0.5  |      | 46,XX                                              |  |  | Del13q        |
| P6610 | F | 47 | O  | A | NO  | 6/19/09  | ALIVE | MD | kappa  | 0.5  | 5.4  | 46,XX                                              |  |  | normal        |
| P4557 | F | 58 | O  | A | NO  | 11/17/09 | ALIVE | MD | kappa  | 0.2  | 20   | 45,X,-X,inv(9)(p11q13)                             |  |  | normal        |
| P103  | F | 45 | O  | A | NO  | 1/20/10  | ALIVE | G  | kappa  | 1.7  |      | 46,XX                                              |  |  | normal        |
| P1082 | F | 67 | O  | A | NO  | 10/11/09 | ALIVE | G  | kappa  | 0.9  |      | 46,XX                                              |  |  | normal        |
| P3916 | M | 43 | O  | A | NO  | 1/18/10  | ALIVE | G  | kappa  | 2.5  | 14   | 46,XY                                              |  |  |               |
| P3021 | M | 44 | I  | A | NO  | 12/7/09  | ALIVE | G  | kappa  | 0.3  | 19   | 46,XY                                              |  |  |               |
| P2740 | M | 47 | O  | A | NO  | 10/12/09 | ALIVE | MD | kappa  | 0.7  |      |                                                    |  |  |               |
| P3551 | F | 58 | O  | A | NO  | 11/25/09 | ALIVE | G  | kappa  | 0.8  |      | 46,XX                                              |  |  | normal        |
| P1563 | M | 69 | II | B | YES | 8/27/08  | ALIVE | MD | kappa  | 0.5  | 18.6 | 46,XY                                              |  |  | Del13q        |
| P6520 | M | 44 | O  | A | YES | 12/16/09 | ALIVE | G  | kappa  | 0.9  | 3.1  | 46,XY (17)                                         |  |  | Del13q        |
| P9297 | M | 69 | O  | A | NO  | 11/16/09 | ALIVE | G  | kappa  | 0.5  | 11.9 |                                                    |  |  |               |
| P711  | M | 65 | II | B | YES | 12/11/09 | ALIVE | MD | kappa  | 4.7  | 8    | 47,XY,+12/46,XY,del(13)(q12q14)/46,XY,del(14)(q24) |  |  |               |
| P1626 | M | 37 | O  | A | YES | 10/24/09 | ALIVE | G  | kappa  | 2    | 9    | 46,XY                                              |  |  | Del13q        |
| P775  | F | 42 | II | B | YES | 5/14/09  | ALIVE | MD | lambda | 1.1  |      | 46,XX                                              |  |  | normal        |
| P781  | F | 55 | II | A | NO  | 11/12/09 | ALIVE | G  | kappa  | 1.4  |      | 46,XX                                              |  |  | Del13q        |
| P4994 | M | 68 | O  | A | YES | 5/27/09  | ALIVE | M  | lambda | 0.1  | 0.4  | 46,XY                                              |  |  | Del13q+Del13q |
| P1615 | F | 61 | O  | A | YES | 11/16/08 | ALIVE | G  | kappa  | 18   | 33   | 47,XX,+12                                          |  |  | Trisomy 12    |
| P1050 | F | 64 | II | B | YES | 2/11/09  | DEAD  | G  | kappa  | 91.3 |      | Not determined                                     |  |  | Del13q+Del13q |
| P2446 | M | 72 | O  | A | NO  | 1/25/10  | ALIVE | G  | kappa  | 54   |      | 47,XY,+12                                          |  |  | Trisomy 12    |
| P104  | M | 69 | O  | A | YES | 12/2/09  | ALIVE | MD | lambda | 51.3 |      | 46,XY                                              |  |  | Trisomy 12    |
| P1522 | M | 63 | O  | A | YES | 5/20/10  | DEAD  | MD | lambda | 2.1  |      | 46,XY                                              |  |  | Del13q+Del13q |
| P6264 | M | 54 | O  | A | NO  | 1/18/10  | ALIVE | MD | lambda | 0.6  | 5.2  | 46,XY (20)                                         |  |  | Del13q        |
| P9391 | M |    |    |   |     |          |       | MD | kappa  | 85.6 | 47.7 |                                                    |  |  |               |
| P1173 | F | 62 | O  | A | YES | 12/17/09 | ALIVE | MD | kappa  | 22.5 | 30   | 46,XX                                              |  |  | Trisomy 12    |
| P5092 | M | 77 | IV | C | YES | 11/12/09 | ALIVE | MD | kappa  | 0.7  | 7.3  | 46,XY,del(11)(q14)                                 |  |  | Del13q+Del11q |

**Supplementary Table S2.** BCR molecular characteristics and subset assignment of CLL cases included in the study.

Subset nomenclature according to Stamatopoulos et al, 2007; Murray et al, 2008.

| Lab Identifier | IGHV                | IGHD        | IGHJ     | %      | Subset |
|----------------|---------------------|-------------|----------|--------|--------|
| P4699          | IGHV1-18*01         | IGHD6-19*01 | IGHJ4*02 | 99.70  | 1      |
| P3506          | IGHV1-2*02          | IGHD6-19*01 | IGHJ4*02 | 99.70  | 1      |
| P3870          | IGHV1-2*02          | IGHD6-19*01 | IGHJ4*02 | 100.00 | 1      |
| P2355          | IGHV1-2*02          | IGHD6-19*01 | IGHJ4*02 | 100.00 | 1      |
| P3073          | IGHV1-3*01          | IGHD6-19*01 | IGHJ4*02 | 100.00 | 1      |
| P1173          | IGHV5- $\alpha$ *01 | IGHD6-19*01 | IGHJ4*02 | 99.60  | 1      |
| P5092          | IGHV5- $\alpha$ *03 | IGHD6-19*01 | IGHJ4*02 | 100.00 | 1      |
| P3020          | IGHV4-34*01         | IGHD3-10*01 | IGHJ6*02 | 90.00  | 4      |
| P103           | IGHV4-34*01         | IGHD3-10*01 | IGHJ6*02 | 95.90  | 4      |
| P3916          | IGHV4-34*01         | IGHD3-10*01 | IGHJ6*02 | 91.20  | 4      |
| P3551          | IGHV4-34*01         | IGHD5-12*01 | IGHJ6*02 | 93.30  | 4      |
| P6520          | IGHV4-34*02         | IGHD3-10*01 | IGHJ6*02 | 94.40  | 4      |
| P1626          | IGHV4-34*02         | IGHD4-17*01 | IGHJ6*02 | 94.80  | 4      |
| P1615          | IGHV4-39*01         | IGHD6-13*01 | IGHJ5*02 | 100.00 | 8      |
| P1050          | IGHV4-39*01         | IGHD6-13*01 | IGHJ5*02 | 100.00 | 8      |
| P2446          | IGHV4-39*06         | IGHD6-13*01 | IGHJ5*02 | 99.70  | 8      |
| P1082          | IGHV4-34*01         | IGHD2-15*01 | IGHJ6*02 | 96.30  | 16     |
| P781           | IGHV4-34*04         | IGHD1-26*01 | IGHJ6*02 | 95.00  | 16     |
| P9297          | IGHV4-34*02         | IGHD2-2*01  | IGHJ6*02 | 95.09  | 16     |
| P4295          | IGHV1-2*02          | IGHD2-8*02  | IGHJ4*02 | 93.80  |        |
| P2685          | IGHV1-3*01          | IGHD1-26*01 | IGHJ5*02 | 87.80  |        |
| P8805          | IGHV1-69*01         | IGHD2-15*01 | IGHJ5*02 | 100.00 |        |
| P9320          | IGHV1-69*01         | IGHD3-16*02 | IGHJ3*02 | 100.00 |        |
| P1697          | IGHV1-69*01         | IGHD3-22*01 | IGHJ4*03 | 93.90  |        |
| P571           | IGHV1-69*01         | IGHD3-10*01 | IGHJ6*02 | 99.40  |        |
| P8762          | IGHV1-69*06         | IGHD5-24*01 | IGHJ4*02 | 100.00 |        |
| P1618          | IGHV1-8*01          | IGHD2-15*01 | IGHJ5*02 | 91.90  |        |
| P1156          | IGHV3-13*01         | IGHD3-3*01  | IGHJ3*02 | 88.70  |        |
| P5283          | IGHV3-20*01         | IGHD6-19*01 | IGHJ1*01 | 97.20  |        |
| P511           | IGHV3-20*01         | IGHD3-3*01  | IGHJ5*02 | 100.00 |        |
| P2329          | IGHV3-21*01         | IGHD4-4*01  | IGHJ4*02 | 96.30  |        |
| P7155          | IGHV3-23*01         | IGHD2-15*01 | IGHJ3*02 | 100.00 |        |
| P2618          | IGHV3-23*01         | IGHD6-6*01  | IGHJ4*02 | 95.90  |        |
| P8192          | IGHV3-23*01         | IGHD3-9*01  | IGHJ4*02 | 91.90  |        |
| P7794          | IGHV3-23*04         | IGHD2-15*01 | IGHJ4*02 | 87.85  |        |
| P6124          | IGHV3-30*01         | IGHD3-10*01 | IGHJ5*02 | 100.00 |        |
| P9940          | IGHV3-30*03         | IGHD3-3*01  | IGHJ6*03 | 94.44  |        |
| P4383          | IGHV3-30*03         | IGHD3-10*01 | IGHJ4*02 | 95.10  |        |
| P6460          | IGHV3-30*03         | IGHD3-10*01 | IGHJ6*02 | 94.10  |        |
| P1894          | IGHV3-30*18         | IGHD1-26*01 | IGHJ3*02 | 92.90  |        |
| P427           | IGHV3-30*18         | IGHD5-24*01 | IGHJ2*01 | 91.20  |        |
| P2577          | IGHV3-33*01         | IGHD6-6*01  | IGHJ3*02 | 91.90  |        |
| P2548          | IGHV3-33*01         | IGHD2-15*01 | IGHJ5*02 | 100.00 |        |
| P5231          | IGHV3-43*01         | IGHD5-5*01  | IGHJ4*02 | 100.00 |        |
| P5728          | IGHV3-48*01         | IGHD3-16*01 | IGHJ4*02 | 97.60  |        |
| P5949          | IGHV3-49*03         | IGHD1-1*01  | IGHJ6*02 | 95.20  |        |
| P4875          | IGHV3-53*02         | IGHD2-15*01 | IGHJ3*02 | 92.60  |        |
| P7961          | IGHV3-64*05         | IGHD3-3*01  | IGHJ4*02 | 99.30  |        |
| P5017          | IGHV3-7*01          | IGHD2-2*01  | IGHJ6*02 | 100.00 |        |
| P6068          | IGHV3-7*01          | IGHD3-22*01 | IGHJ4*02 | 94.80  |        |

*Continued*

Supplementary Table S2. *Continued.*

---

|       |             |             |          |       |
|-------|-------------|-------------|----------|-------|
| P1055 | IGHV3-74*02 | IGHD4-17*01 | IGHJ4*03 | 92.20 |
| P1188 | IGHV3-9*01  | ND          | IGHJ6*02 | 96.30 |
| P280  | IGHV4-31*01 | IGHD4-4*01  | IGHJ6*02 | 94.30 |
| P2528 | IGHV4-34*01 | IGHD1-14*01 | IGHJ4*02 | 95.60 |
| P8699 | IGHV4-34*01 | IGHD3-3*01  | IGHJ4*02 | 91.93 |
| P5610 | IGHV4-34*01 | IGHD4-23*01 | IGHJ6*02 | 94.70 |
| P4557 | IGHV4-34*01 | IGHD2-2*01  | IGHJ4*02 | 97.20 |
| P3021 | IGHV4-34*01 | IGHD3-10*01 | IGHJ3*02 | 93.50 |
| P2740 | IGHV4-34*01 | IGHD4-4*01  | IGHJ4*02 | 95.90 |
| P1563 | IGHV4-34*01 | IGHD1-26*01 | IGHJ6*03 | 93.20 |
| P711  | IGHV4-34*02 | IGHD6-19*01 | IGHJ4*03 | 97.40 |
| P775  | IGHV4-34*04 | IGHD2-8*01  | IGHJ3*01 | 94.10 |
| P4994 | IGHV4-34*12 | IGHD6-6*01  | IGHJ4*02 | 94.00 |
| P104  | IGHV4-39*06 | IGHD2-2*01  | IGHJ6*02 | 99.60 |
| P1522 | IGHV4-61*02 | IGHD6-6*01  | IGHJ3*02 | 98.30 |
| P6264 | IGHV5-51*01 | IGHD2-2*01  | IGHJ6*03 | 92.70 |
| P9391 | IGHV5-51*01 | IGHD1-26*01 | IGHJ4*02 | 93.40 |

---

**Supplementary Table S3.** CD25 and CD86 expression after stimulation of TLRs and NOD2 with appropriate, specific ligands. The percentages are normalized to the unstimulated control.

M: mutated *IGHV*; U: Unmutated *IGHV*; M/4: mutated, subset #4; M/4-34: mutated, *IGHV*4-34 case, non subset #4/16; M/16: mutated, subset #16; UM/1: unmutated, subset #1; UM/8: unmutated, subset #8

CpG: ODN 2006; PAM: Pam3CSK4; M: MALP-2; I: imiquimod; L: loxoribine; O: ORN09

\*n: number of responsive cases.

| Cohort   | n*    | median | range     |
|----------|-------|--------|-----------|
| CpG/CD25 | 67/67 | 55.9   | 10.7-94.9 |
| CpG/CD86 | 44/67 | 24.9   | 0.8-82.6  |
| PAM/CD25 | 57/67 | 37.5   | 1.7-89.4  |
| PAM/CD86 | 49/67 | 28.4   | 2.6-74.6  |
| M/CD25   | 55/67 | 29.8   | 2.1-80.1  |
| M/CD86   | 44/67 | 15.5   | -8.5-70.9 |
| MDP/CD25 | 55/67 | 23.8   | -1.4-72.1 |
| MDP/CD86 | 35/67 | 10.3   | -2-56.3   |
| I/CD25   | 39/67 | 14.4   | -9-93.7   |
| I/CD86   | 21/67 | 4      | -9.5-45.3 |
| L/CD25   | none  | 1.6    | -6.7-9.6  |
| L/CD86   | 4/67  | 0.25   | -7.7-47.6 |
| O/CD25   | none  | 0.4    | -6-9.8    |
| O/CD86   | none  | 0.1    | -4.8-9.5  |
| LPS/CD25 | none  | 2.05   | -8.2-9.7  |
| LPS/CD86 | none  | 0.8    | -5.2-9.7  |

## MEDIAN VALUES

|          | M     | UM    | subset #4 | subset #1 | subset #16 | subset #8 | non #4/16 |
|----------|-------|-------|-----------|-----------|------------|-----------|-----------|
| CpG/CD25 | 51.30 | 64.90 | 61.85     | 54.10     | 37.4       | 83        | 32.8      |
| CpG/CD86 | 40.35 | 8.20  | 56.75     | 4.30      | 24.9       | 26.8      | 41.8      |
| PAM/CD25 | 33.00 | 52.40 | 57.85     | 30.70     | 36.5       | 82.8      | 7.9       |
| PAM/CD86 | 29.25 | 24.30 | 50.95     | 11.00     | 55.5       | 36.5      | 9.8       |
| M/CD25   | 22.10 | 33.70 | 35.05     | 30.10     | 47         | 38.2      | 10.6      |
| M/CD86   | 21.25 | 11.80 | 41.35     | 6.30      | 41.1       | 16.4      | 15.3      |
| MDP/CD25 | 21.75 | 30.70 | 27.80     | 30.70     | 28.8       | 21        | 14.65     |
| MDP/CD86 | 15.15 | 5.60  | 31.45     | 2.80      | 27.5       | 8.1       | 16.2      |
| I/CD25   | 8.40  | 50.10 | 11.00     | 46.80     | 7.2        | 75.6      | 2.35      |
| I/CD86   | 3.55  | 4.20  | 7.50      | 0.50      | 14.9       | 18.3      | 2         |
| L/CD25   | -4.95 | 2.35  | -8.40     | 3.95      | -11.7      | -0.6      | -5.2      |
| L/CD86   | -1.05 | 0.95  | -2.80     | 0.20      | -2.4       | 1.1       | -1.2      |
| O/CD25   | 0.40  | 0.55  | -0.10     | 2.20      | 0.7        | 0.55      | 0.05      |
| O/CD86   | 0.00  | -0.15 | -0.65     | -0.20     | 0          | 1.25      | -0.55     |
| LPS/CD25 | 2.20  | 2.00  | 1.30      | 2.50      | 7          | 2.3       | 1.95      |
| LPS/CD86 | 1.70  | 0.00  | 2.75      | 0.00      | 4.7        | 2.1       | 1.5       |

## P VALUES

|          | M vs. UM         | #4 vs. #1        | #4 vs. #16   | #1 vs. #8    | #4 vs. non #4/16 | #16 vs. non #4/16 | M vs. #4     | M vs. #16    | UM vs. #1 | UM vs. #8    |
|----------|------------------|------------------|--------------|--------------|------------------|-------------------|--------------|--------------|-----------|--------------|
| CpG/CD25 | 0.088            | 0.773            | 0.082        | 0.090        | <b>0.022</b>     | 0.932             | 0.488        | 0.270        | 0.243     | 0.059        |
| CpG/CD86 | <b>&lt;0.001</b> | <b>&lt;0.001</b> | <b>0.031</b> | <b>0.048</b> | 0.118            | 0.428             | 0.055        | 0.451        | 0.174     | 0.274        |
| PAM/CD25 | 0.071            | 0.427            | 0.373        | <b>0.050</b> | <b>0.007</b>     | 0.193             | 0.252        | 0.984        | 0.145     | <b>0.050</b> |
| PAM/CD86 | 0.361            | <b>0.034</b>     | 0.869        | 0.162        | <b>0.003</b>     | <b>0.038</b>      | 0.093        | 0.265        | 0.275     | 0.194        |
| M/CD25   | 0.002            | 0.692            | 0.254        | 0.588        | <b>0.033</b>     | <b>0.004</b>      | 0.276        | <b>0.021</b> | 0.582     | 0.515        |
| M/CD86   | 0.181            | <b>0.049</b>     | 0.298        | 0.699        | <b>0.022</b>     | <b>0.002</b>      | 0.080        | <b>0.004</b> | 0.492     | 0.853        |
| MDP/CD25 | 0.073            | 0.979            | 0.429        | 0.942        | <b>0.019</b>     | 0.262             | 0.320        | 0.907        | 0.697     | 0.930        |
| MDP/CD86 | <b>0.002</b>     | <b>0.001</b>     | 0.270        | 0.795        | <b>0.019</b>     | 0.395             | <b>0.021</b> | 0.508        | 0.540     | 0.969        |
| I/CD25   | <b>&lt;0.001</b> | <b>0.026</b>     | 0.910        | 0.073        | 0.009            | 0.035             | 0.638        | 0.686        | 0.433     | <b>0.028</b> |
| I/CD86   | 0.134            | 0.057            | 0.983        | 0.074        | 0.214            | 0.285             | 0.405        | 0.530        | 0.200     | <b>0.034</b> |
| L/CD25   | 0.000            | 0.003            | 0.337        | 0.338        | 0.503            | 0.195             | 0.284        | 0.073        | 0.338     | 0.288        |
| L/CD86   | 0.451            | 0.452            | 0.897        | 0.181        | 0.181            | 0.310             | 0.169        | 0.270        | 0.252     | 0.073        |
| O/CD25   | 0.389            | 0.095            | 0.411        | 0.438        | 0.540            | 0.291             | 0.436        | 0.471        | 0.037     | 0.786        |
| O/CD86   | 0.629            | 0.525            | 0.463        | 0.373        | 0.776            | 0.516             | 0.834        | 0.596        | 0.367     | 0.349        |
| LPS/CD25 | 0.640            | 0.737            | 0.041        | 0.781        | 0.997            | 0.015             | 0.473        | 0.000        | 0.516     | 0.001        |
| LPS/CD86 | 0.637            | 0.372            | 0.077        | 0.488        | 0.663            | 0.077             | 0.751        | 0.005        | 0.460     | 0.001        |



**Supplementary Table S4.** Percentage of live cells after TLR and NOD2 stimulation. In cases where the percentage of live cells in the control was less than 10%, only the protective effect was evaluated.

CTL: control; C: CpG ODN 2006;  
P: Pam3CSK4; MA: MALP-2; M: MDP;  
I: imiquimod; L: loxoribine; O: ORN09;  
LP:LPS

| Lab Identifier | median | range     |
|----------------|--------|-----------|
| CTL Day3       | 68.7   | 38-94.8   |
| CTL Day6       | 50.35  | 0.8-91.5  |
| CTL Day9       | 26     | 0.3-83.4  |
| C Day3         | 63.9   | 6.4-96.7  |
| C Day6         | 44.75  | 1.7-93.6  |
| C Day9         | 22.7   | 0.3-83.2  |
| P Day3         | 71.6   | 40.2-95.3 |
| P Day6         | 60.45  | 3.8-92.9  |
| P Day9         | 52.3   | 0.1-82.1  |
| MA Day3        | 66     | 14.8-93.9 |
| MA Day6        | 54.35  | 2.1-91.9  |
| MA Day9        | 51.1   | 0.2-82.8  |
| M Day3         | 78     | 0.9-97    |
| M Day6         | 65.6   | 1.1-92.7  |
| M Day9         | 62.4   | 0.2-88.9  |
| I Day3         | 67.7   | 14.4-93.5 |
| I Day6         | 31.35  | 0.5-86.3  |
| I Day 9        | 8.6    | 0.3-56.1  |
| L Day3         | 69.35  | 9.2-95.3  |
| L Day6         | 35.8   | 3.6-93.3  |
| L Day9         | 4.7    | 0.5-84.6  |
| O Day3         | 72.55  | 37.3-94.5 |
| O Day6         | 51.3   | 0.8-92.6  |
| O Day9         | 28.95  | 0.5-86.7  |
| LP Day3        | 70.2   | 14-94     |
| LP Day6        | 51.9   | 0.9-93    |
| LP Day9        | 26.4   | 0.4-82.2  |

**Supplementary Table S5.** Median and p values of live cells, after TLR and NOD2 stimulation, for all compared groups in the study.

Before analysis values were normalized to the unstimulated controls  
M:mutated *IGHV*; UM: Unmutated *IGHV*; non #4/16: mutated, *IGHV*4-34 case, non subset #4/16

C: CpG ODN 2006; P: Pam3CSK4; MA: MALP-2; M: MDP; I: imiquimod; L: loxoribine.

|         | Median Values |           |                  |           |           |
|---------|---------------|-----------|------------------|-----------|-----------|
|         | M             | UM        | subset #4        | subset #1 | non #4/16 |
| C Day3  | -7.5          | 7.7       | -7.5             | 23.7      | -35.5     |
| P Day3  | 2.9           | -1        | 5.85             | 5.7       | -1.6      |
| MA Day3 | -3.3          | -4.8      | 0.35             | -2.95     | -4.9      |
| M Day3  | 2.95          | 5.5       | 9.75             | 18.3      | -11       |
| I Day3  | -21.45        | 1.2       | -1.9             | 8.7       | -32.8     |
| L Day3  | -3.65         | -3.2      | 3.8              | 0.2       | -21.4     |
| C Day6  | -16.65        | 1.65      | -14.1            | 4.55      | -28.5     |
| P Day6  | 1.65          | -2.15     | 9.8              | -0.9      | -1.85     |
| MA Day6 | 2.7           | -4.2      | 6.6              | -4.2      | -5.8      |
| M Day6  | 0.65          | 9.65      | 7                | 12.85     | -0.75     |
| I Day6  | -27.3         | -7.3      | -18              | 3.2       | -43.15    |
| L Day6  | -22.4         | 1.1       | -14.3            | 0.25      | -15.85    |
| C Day9  | 0             | -26.6     | 11.1             | -6.85     | -6.6      |
| P Day9  | 16.9          | -3.6      | 44.3             | -1.65     | 15.3      |
| MA Day9 | 17.1          | -8.1      | 42.2             | -8.1      | 6.8       |
| M Day9  | 21.6          | 10.15     | 36.6             | 16.6      | 12.9      |
| I Day 9 | -24.5         | -28.95    | -24.9            | -19.45    | -40       |
| L Day9  | -11.3         | -5        | -17.25           | -20.1     | -14.2     |
|         | P VALUES      |           |                  |           |           |
|         | M vs. UM      | #4 vs. #1 | #4 vs. non #4/16 | M vs. #4  | UM vs. #1 |
| C Day3  | 0.007         | 0.031     | 0.674            | 0.625     | 0.050     |
| P Day3  | 0.341         | 0.456     | 0.058            | 0.495     | 0.068     |
| MA Day3 | 0.629         | 0.736     | 0.934            | 0.687     | 0.171     |
| M Day3  | 0.174         | 0.202     | 0.863            | 0.744     | 0.009     |
| I Day3  | 0.007         | 0.198     | 0.188            | 0.290     | 0.145     |
| L Day3  | 0.832         | 0.875     | 0.115            | 0.656     | 0.649     |
| C Day6  | 0.006         | 0.198     | 0.543            | 0.621     | 0.660     |
| P Day6  | 0.911         | 0.298     | 0.171            | 0.012     | 0.787     |
| MA Day6 | 0.184         | 0.108     | 0.142            | 0.049     | 0.947     |
| M Day6  | 0.102         | 0.498     | 0.491            | 0.308     | 0.735     |
| I Day6  | 0.007         | 0.371     | 0.050            | 0.076     | 0.485     |
| L Day6  | 0.422         | 0.849     | 0.543            | 0.450     | 0.633     |
| C Day9  | 0.735         | 0.992     | 0.684            | 0.980     | 0.724     |
| P Day9  | 0.006         | 0.003     | 0.080            | 0.029     | 0.726     |
| MA Day9 | 0.001         | 0.001     | 0.050            | 0.026     | 0.952     |
| M Day9  | 0.062         | 0.016     | 0.100            | 0.074     | 0.178     |
| I Day 9 | 0.661         | 0.938     | 0.216            | 0.918     | 0.506     |
| L Day9  | 0.473         | 0.777     | 0.984            | 0.568     | 0.695     |
